# Supplementary material
Source: publisher figshare collection journal article supplement (https://sage.figshare.com/ndownloader/files/12778067)
Supplement: Supplementary file 1 [file 12778067]

Figure S1. *Spanish literacy proficiency of Mexican 9<sup>th</sup> grade students by school type—2008*

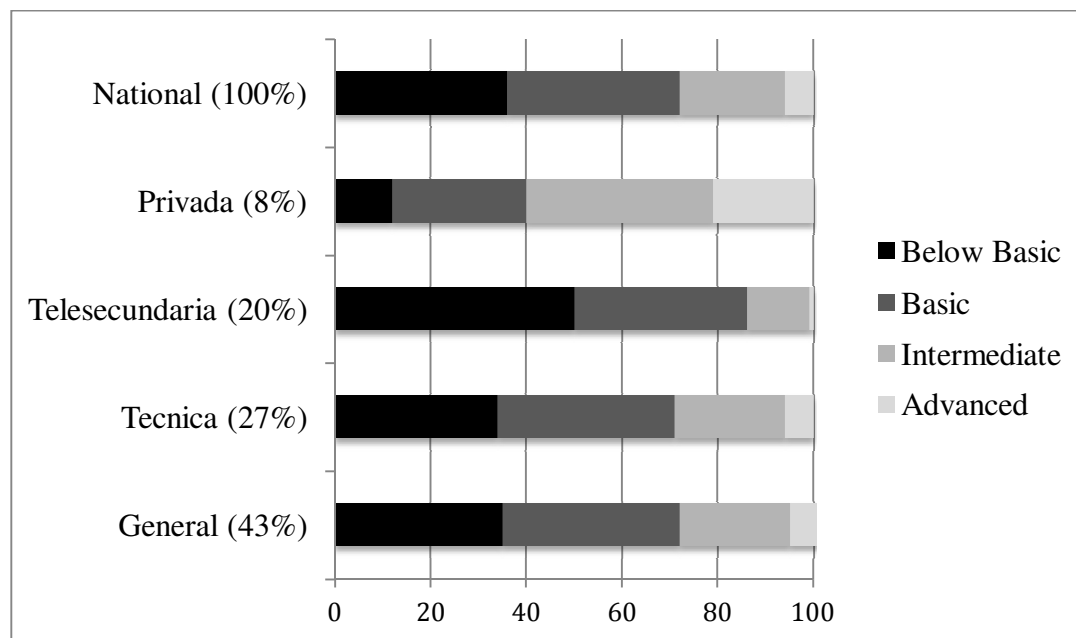

Source: INEE (2009)

Table S1. *Migration Intensity Index at the Municipal Level, Mexico 2010.*

| Migration<br>Relevance Category | Number of<br>Municipalities | Range         |               |
|---------------------------------|-----------------------------|---------------|---------------|
|                                 |                             | Minimum Value | Maximum Value |
| Null                            | 11                          | -1.1644       |               |
| Very Low                        | 603                         | -1.1608       | -.7889        |
| Low                             | 719                         | -.7882        | -.1681        |
| Medium                          | 514                         | -.1670        | .5734         |
| High                            | 431                         | .5786         | 1.6935        |
| Very High                       | 178                         | 1.7024        | 5.0482        |

Source: CONAPO (2012)

Table S2. *Frequency of student migration plans crossed with migration and background variables among 9<sup>th</sup> grade students—Mexico, 2008*

|                     |                      |                | Student Migration Plans |                                 |          |          |               |
|---------------------|----------------------|----------------|-------------------------|---------------------------------|----------|----------|---------------|
|                     |                      |                | Not Migrating           | Undecided<br>(whether and when) | After MS | After HS | After College |
| Migration           | Municipal Prevalence | Null/Very Low  | 23.0                    | 43.9                            | 2.9      | 6.8      | 23.4          |
|                     |                      | Low            | 20.7                    | 46.5                            | 4.2      | 6.8      | 21.8          |
|                     |                      | Medium         | 19.5                    | 46.9                            | 6.0      | 8.2      | 19.4          |
|                     |                      | High/Very High | 14.8                    | 48.9                            | 9.3      | 8.8      | 18.1          |
|                     | Family History       | None           | 33.7                    | 46.1                            | 1.4      | 2.9      | 15.9          |
|                     |                      | Other          | 17.8                    | 47.4                            | 3.4      | 7.3      | 24.2          |
|                     |                      | One Parent     | 13.9                    | 43.5                            | 8.1      | 11.2     | 23.3          |
|                     |                      | Both Parents   | 7.7                     | 37.3                            | 14.9     | 13.6     | 26.5          |
| Background          | Maternal Education   | None           | 17.9                    | 55.6                            | 8.1      | 5.1      | 13.3          |
|                     |                      | Incom Prim     | 21.1                    | 50.4                            | 6.3      | 7.1      | 15.1          |
|                     |                      | Primary        | 19.2                    | 52.8                            | 5.5      | 6.8      | 15.7          |
|                     |                      | Mid School     | 23.5                    | 45.1                            | 3.2      | 6.5      | 21.7          |
|                     |                      | High School    | 21.2                    | 40.5                            | 2.2      | 8.0      | 28.1          |
|                     |                      | Bachelors      | 20.2                    | 34.0                            | 4.2      | 8.3      | 33.3          |
|                     |                      | Post-grad      | 17.2                    | 39.2                            | 4.8      | 8.8      | 30.0          |
| Student Disposition | Grade Retention      | None           | 21.2                    | 45.4                            | 3.9      | 7.0      | 22.6          |
|                     |                      | One            | 19.9                    | 48.2                            | 7.6      | 8.6      | 15.7          |
|                     |                      | 2+             | 15.8                    | 45.8                            | 13.5     | 10.7     | 14.2          |
|                     | Course Failure       | None           | 22.0                    | 44.5                            | 2.7      | 6.2      | 24.7          |
|                     |                      | 1 to 2         | 20.3                    | 46.6                            | 5.7      | 8.5      | 18.9          |
|                     |                      | 3 to 4         | 19.7                    | 49.9                            | 7.4      | 7.9      | 15.1          |
|                     |                      | 5+             | 15.6                    | 42.0                            | 12.6     | 9.0      | 20.8          |
|                     | Daily Homework       | None           | 12.8                    | 43.7                            | 17.6     | 9.7      | 16.2          |
|                     |                      | One            | 16.8                    | 52.5                            | 7.1      | 9.6      | 13.9          |
|                     |                      | 2 to 3         | 17.9                    | 49.1                            | 4.5      | 8.5      | 20.0          |
|                     |                      | 4 to 5         | 20.5                    | 46.6                            | 3.8      | 6.7      | 22.4          |
|                     |                      | 6 to 7         | 23.7                    | 46.1                            | 3.7      | 3.4      | 23.2          |
|                     | Ungraded Homework    | Almost never   | 15.7                    | 47.4                            | 6.9      | 10.5     | 19.5          |
|                     |                      | Rarely         | 18.1                    | 49.9                            | 4.8      | 7.8      | 19.3          |
|                     |                      | Often          | 20.3                    | 47.0                            | 3.7      | 6.6      | 22.4          |
|                     |                      | Very often     | 24.4                    | 43.5                            | 3.9      | 5.2      | 23.1          |
|                     | Class Attention      | Never          | 14.8                    | 41.3                            | 12.2     | 8.2      | 23.5          |
|                     |                      | Rarely         | 17.4                    | 50.3                            | 7.6      | 9.7      | 15.0          |
|                     |                      | Often          | 20.2                    | 45.9                            | 4.1      | 7.5      | 22.4          |
|                     |                      | Very Often     | 24.5                    | 43.1                            | 3.3      | 5.4      | 23.6          |

Source: Authors' estimates based on *Exscale 2008*.
